# Supplementary material for: Deep learning for ‘artefact’ removal in infrared spectroscopy
Source: Royal Society of Chemistry journal article supplement (doi:10.1039/d0an00917b), 2020-01-01
Supplement: d0an00917b1.pdf [file d0an00917b1.pdf]

## Deep Learning for 'Artefact' Removal in Infrared Spectroscopy

Shuxia Guo<sup>1,2</sup>, Thomas Mayerhöfer<sup>1,2</sup>, Susanne Pahlow<sup>1,2</sup>, Uwe Hübner<sup>1</sup>, Jürgen Popp<sup>1,2</sup>, Thomas Bocklitz<sup>1,2</sup>

1. Leibniz Institute of Photonic Technology Jena (IPHT Jena), Member of Leibniz Health Technologies, 07745 Jena, Germany

2. Institute of Physical Chemistry and Abbe Center of Photonics, Friedrich Schiller University of Jena, 07743 Jena, Germany

Table S1. 17 oscillators of the PMMA material, all in unit of  $\text{cm}^{-1}$ .

| #        | Strength | Damping | Resonance | #         | Strength | Damping | Resonance |
|----------|----------|---------|-----------|-----------|----------|---------|-----------|
| <b>1</b> | 47.0     | 18.850  | 750.0     | <b>10</b> | 100.5    | 34.071  | 1263.0    |
| <b>2</b> | 51.3     | 33.890  | 838.4     | <b>11</b> | 57.0     | 28.913  | 1378.7    |
| <b>3</b> | 34.9     | 32.668  | 913.2     | <b>12</b> | 106.3    | 30.655  | 1441.8    |
| <b>4</b> | 66.7     | 32.369  | 960.1     | <b>13</b> | 72.5     | 28.471  | 1475.5    |
| <b>5</b> | 53.1     | 17.328  | 985.2     | <b>14</b> | 201.0    | 17.570  | 1727.0    |
| <b>6</b> | 34.8     | 17.315  | 1063.3    | <b>15</b> | 34.9     | 32.328  | 2843.0    |
| <b>7</b> | 198.6    | 37.811  | 1145.1    | <b>16</b> | 123.6    | 62.379  | 2946.4    |
| <b>8</b> | 120.4    | 27.006  | 1186.1    | <b>17</b> | 74.4     | 34.947  | 3002.5    |
| <b>9</b> | 92.3     | 23.638  | 1236.3    |           |          |         |           |

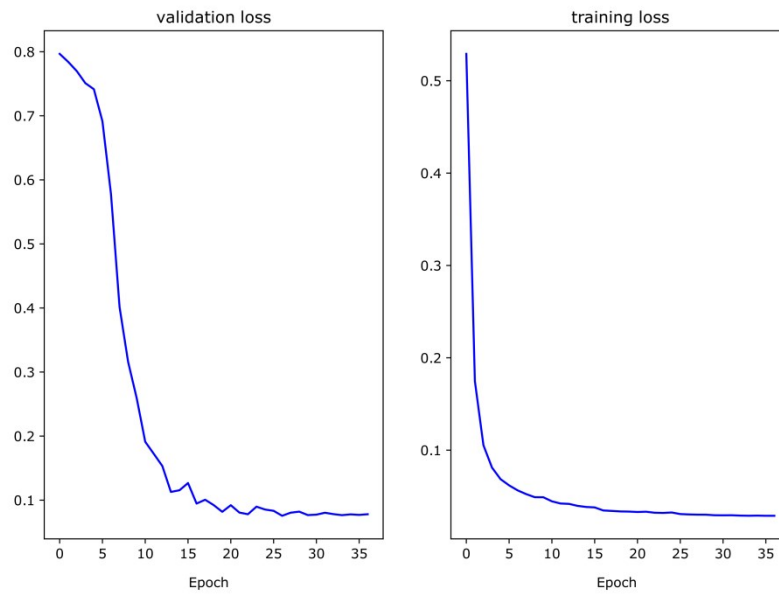

Figure S1 The loss on the validation and training data over the epochs of the training phase. The training was early stopped at 37 epochs, 10 epochs after the validation loss stopped to decrease.

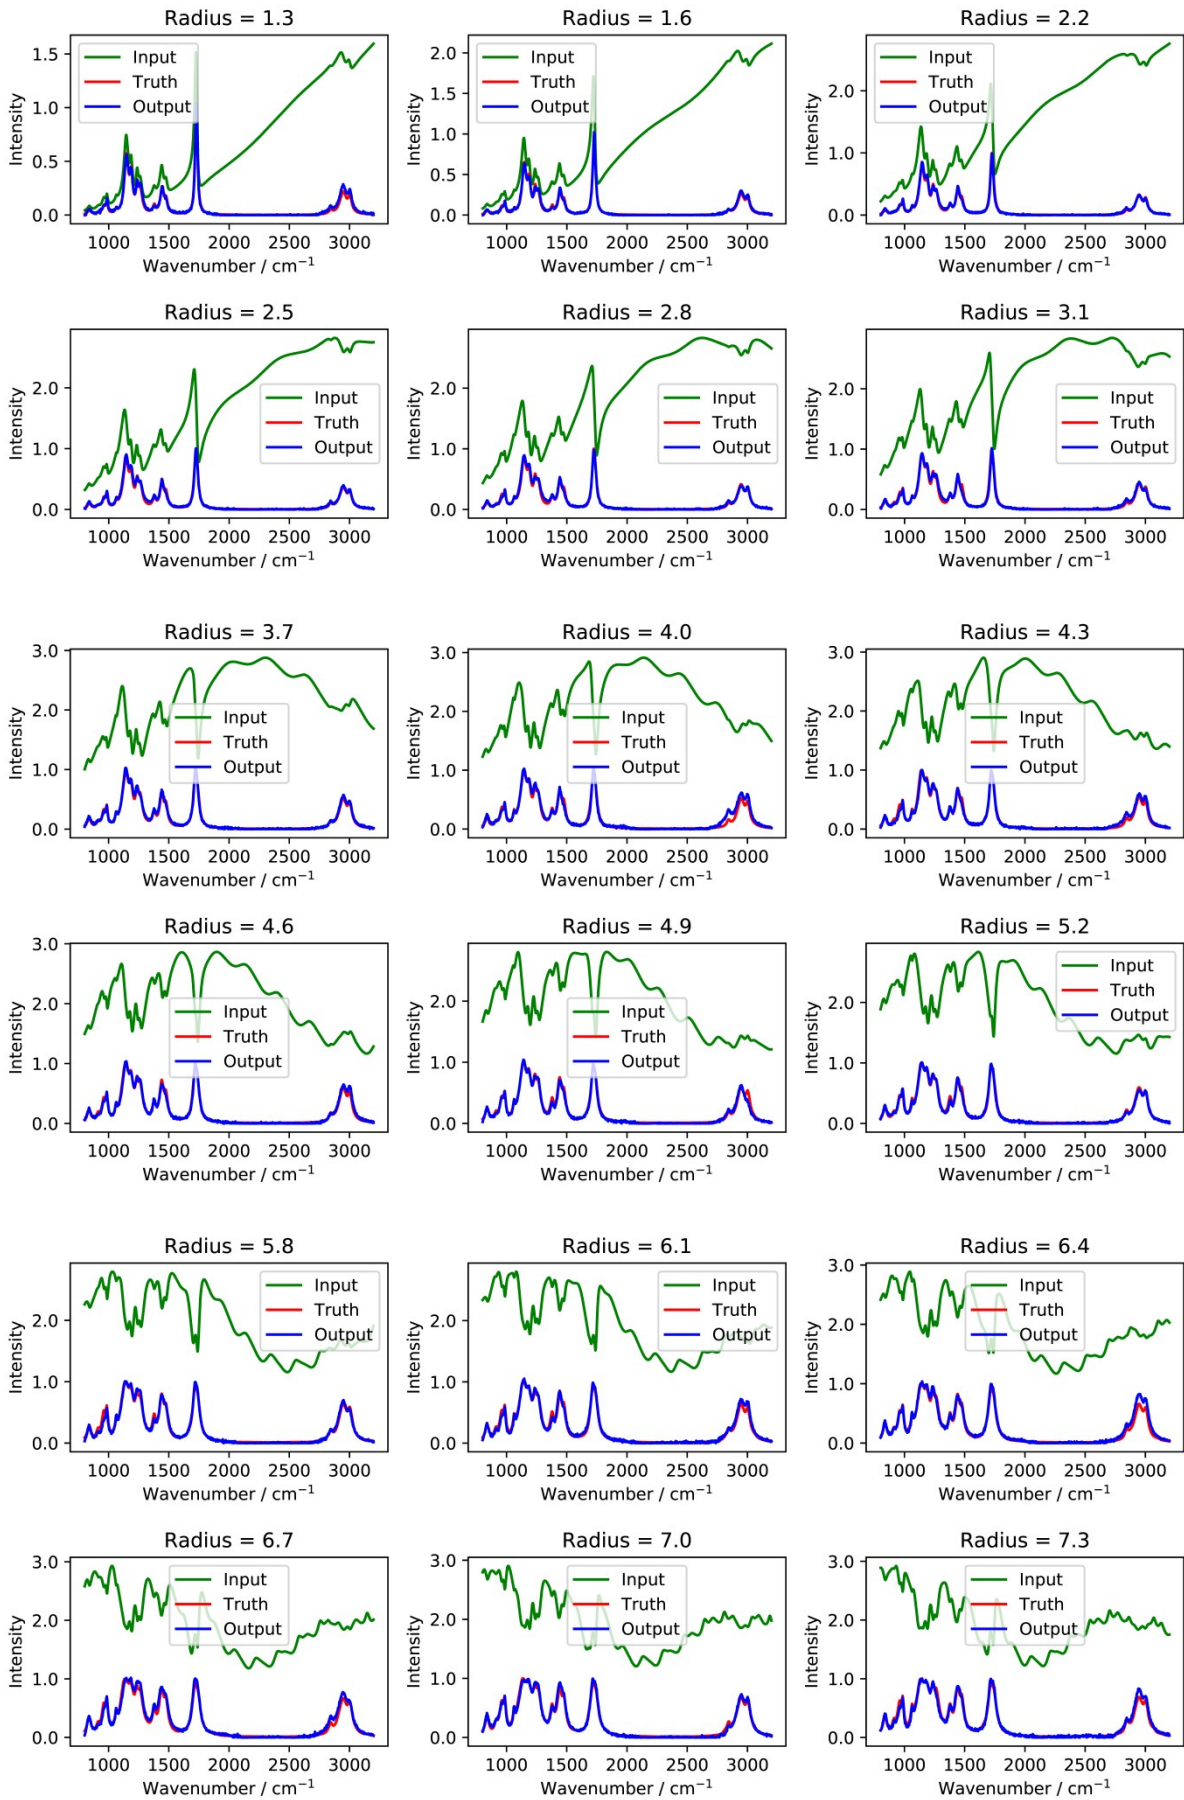

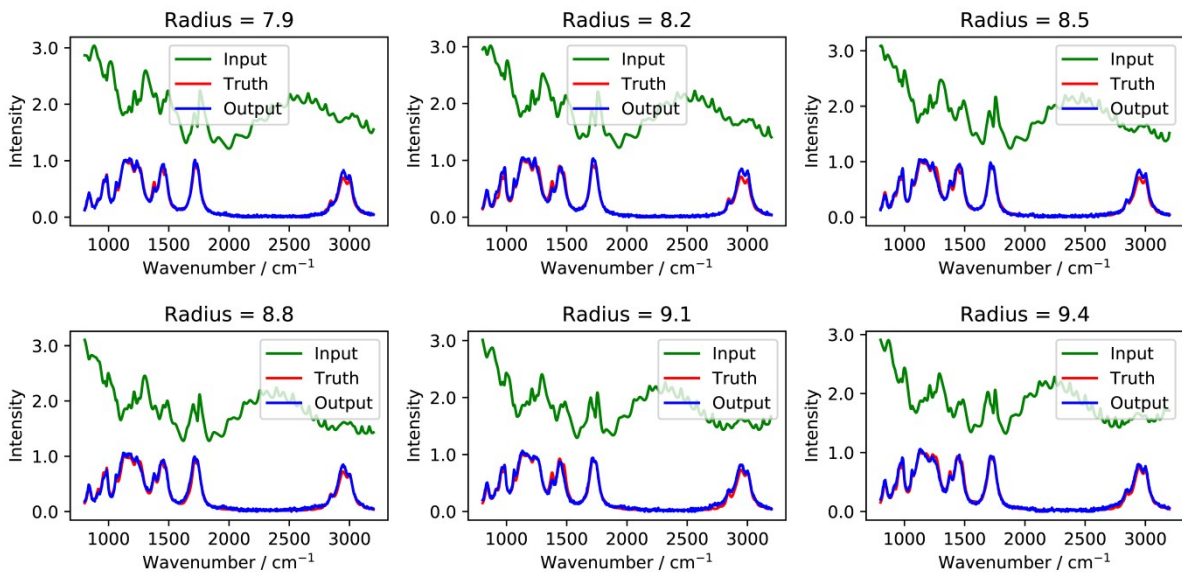

Figure S2 The results of simulated testing data. The results were plotted for every one in three spectra from the whole datasets.

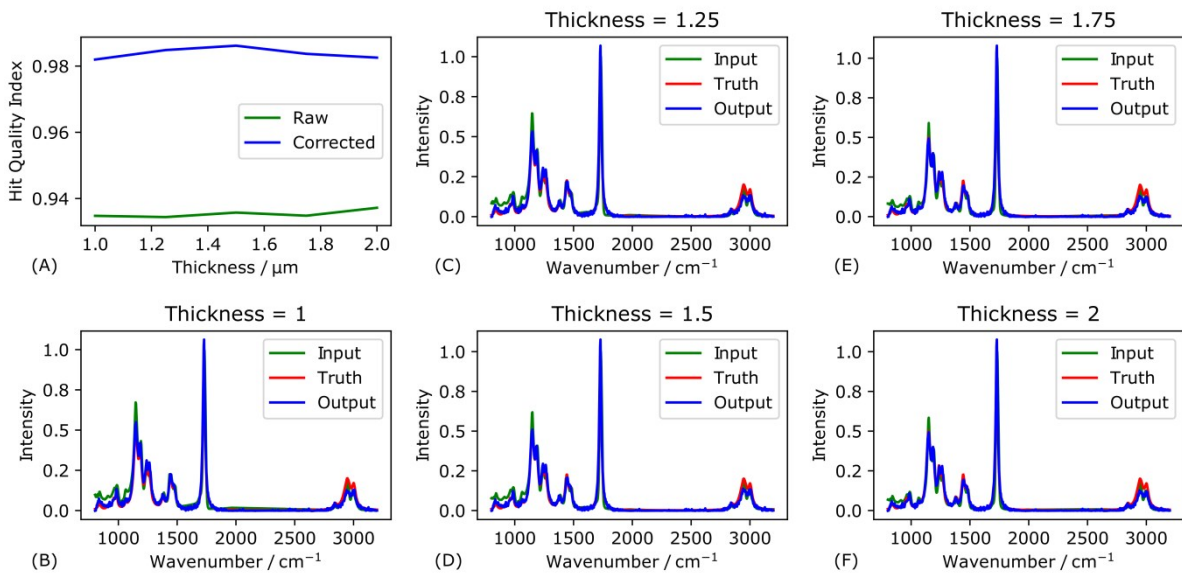

Figure S3 Results from measured PMMA spectra on the substrate CaF<sub>2</sub> of different thickness. (A) The results of the HQI calculated before and after correction. (B-F) The results of the prediction for spectra of different thickness.

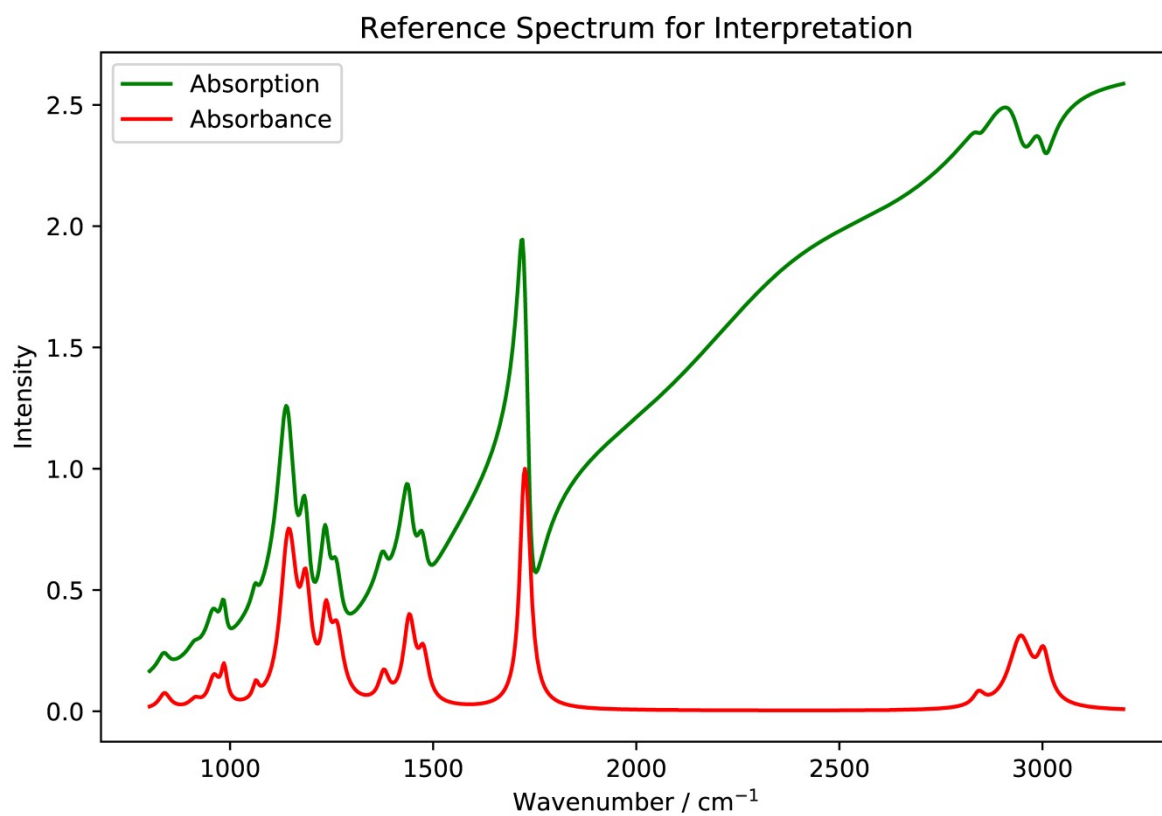

Figure S4. Reference spectrum used for the network interpretation, with apparent absorption in green and the absorbance in red. The apparent absorption was used as the input for the direct visualization, while the absorbance was implemented in the saliency-based method for the calculation of the cost defined in Eq. (4)
